# Supplementary material for: Supramolecular hydrogels formed by β-cyclodextrin self-association and host–guest inclusion complexes
Source: Royal Society of Chemistry journal article supplement (doi:10.1039/b916378f), 2009-11-03
Supplement: b916378f.pdf [file b916378f.pdf]

# Supramolecular Hydrogels Formed by $\beta$ -Cyclodextrin Self-Association and Host-Guest Inclusion Complexes

*Frank van de Manakker, Loes M.J. Kroon-Batenburg, Tina Vermonden, Cornelus F. van Nostrum,*

*Wim E. Hennink*

## Supporting information:

**Table S1. Composition of the PEG<sub>8</sub>-chol<sub>5,6</sub>/ $\beta$ CD mixtures discussed in this study.**

| <b>Gel composition</b>                                             | <b>PEG<sub>8</sub>-chol content<br/>(% (w/w))</b> | <b><math>\beta</math>CD content<br/>(% (w/w))</b> | <b>Buffer content<br/>(% (w/w))</b> |
|--------------------------------------------------------------------|---------------------------------------------------|---------------------------------------------------|-------------------------------------|
| 2 % PEG <sub>8</sub> 20K-chol <sub>5,6</sub> + 1 eq. $\beta$ CD    | 2                                                 | 0.6                                               | 97.4                                |
| 5 % PEG <sub>8</sub> 20K-chol <sub>5,6</sub> + 1 eq. $\beta$ CD    | 5                                                 | 1.4                                               | 93.6                                |
| 10 % PEG <sub>8</sub> 20K-chol <sub>5,6</sub> + 1 eq. $\beta$ CD   | 10                                                | 2.8                                               | 87.2                                |
| 15 % PEG <sub>8</sub> 20K-chol <sub>5,6</sub> + 1 eq. $\beta$ CD   | 15                                                | 4.1                                               | 80.9                                |
| 20 % PEG <sub>8</sub> 20K-chol <sub>5,6</sub> + 1 eq. $\beta$ CD   | 20                                                | 5.5                                               | 74.5                                |
| 22.5 % PEG <sub>8</sub> 20K-chol <sub>5,6</sub> + 1 eq. $\beta$ CD | 22.5                                              | 6.2                                               | 71.3                                |
| 25 % PEG <sub>8</sub> 20K-chol <sub>5,6</sub> + 1 eq. $\beta$ CD   | 25                                                | 6.9                                               | 68.1                                |
|                                                                    |                                                   |                                                   |                                     |
| 2 % PEG <sub>8</sub> 20K-chol <sub>5,6</sub> + 2 eq. $\beta$ CD    | 2                                                 | 1.1                                               | 96.9                                |
| 5 % PEG <sub>8</sub> 20K-chol <sub>5,6</sub> + 2 eq. $\beta$ CD    | 5                                                 | 2.8                                               | 92.2                                |
| 10 % PEG <sub>8</sub> 20K-chol <sub>5,6</sub> + 2 eq. $\beta$ CD   | 10                                                | 5.5                                               | 84.5                                |
| 15 % PEG <sub>8</sub> 20K-chol <sub>5,6</sub> + 2 eq. $\beta$ CD   | 15                                                | 8.3                                               | 76.7                                |
| 20 % PEG <sub>8</sub> 20K-chol <sub>5,6</sub> + 2 eq. $\beta$ CD   | 20                                                | 11.0                                              | 69.0                                |
| 22.5 % PEG <sub>8</sub> 20K-chol <sub>5,6</sub> + 2 eq. $\beta$ CD | 22.5                                              | 12.4                                              | 65.1                                |
| 25 % PEG <sub>8</sub> 20K-chol <sub>5,6</sub> + 2 eq. $\beta$ CD   | 25                                                | 13.8                                              | 61.2                                |

|                                                                     |      |      |      |
|---------------------------------------------------------------------|------|------|------|
|                                                                     |      |      |      |
| 22.5 % PEG <sub>8</sub> 20K-cho <sub>5,6</sub> + 0.5 eq. $\beta$ CD | 22.5 | 3.1  | 74.4 |
| 22.5 % PEG <sub>8</sub> 20K-cho <sub>5,6</sub> + 4 eq. $\beta$ CD   | 22.5 | 24.8 | 52.7 |
|                                                                     |      |      |      |
| 15 % PEG <sub>8</sub> 10K-cho <sub>5,6</sub> + 2 eq. $\beta$ CD     | 15   | 15.2 | 69.8 |
| 15 % PEG <sub>8</sub> 40K-cho <sub>5,7</sub> + 2 eq. $\beta$ CD     | 15   | 4.3  | 80.7 |
| 15 % PEG <sub>8</sub> 40K-cho <sub>5,7</sub> + 4 eq. $\beta$ CD     | 15   | 8.5  | 76.5 |

**Table S2. Composition of the PEG6K-cho<sub>1,8</sub>/ $\beta$ CD mixtures discussed in this study.**

| <b>Gel composition</b>                             | <b>PEG<sub>8</sub>20K-cho<sub>5,6</sub> content<br/>(% (w/w))</b> | <b><math>\beta</math>CD content<br/>(% (w/w))</b> | <b>Buffer content<br/>(% (w/w))</b> |
|----------------------------------------------------|-------------------------------------------------------------------|---------------------------------------------------|-------------------------------------|
| 2 % PEG6K-cho <sub>1,8</sub> + 1 eq. $\beta$ CD    | 2                                                                 | 0.5                                               | 97.5                                |
| 5 % PEG6K-cho <sub>1,8</sub> + 1 eq. $\beta$ CD    | 5                                                                 | 1.4                                               | 93.6                                |
| 10 % PEG6K-cho <sub>1,8</sub> + 1 eq. $\beta$ CD   | 10                                                                | 2.7                                               | 87.2                                |
| 15 % PEG6K-cho <sub>1,8</sub> + 1 eq. $\beta$ CD   | 15                                                                | 4.1                                               | 80.9                                |
| 20 % PEG6K-cho <sub>1,8</sub> + 1 eq. $\beta$ CD   | 20                                                                | 5.5                                               | 74.5                                |
| 22.5 % PEG6K-cho <sub>1,8</sub> + 1 eq. $\beta$ CD | 22.5                                                              | 6.2                                               | 71.3                                |
| 25 % PEG6K-cho <sub>1,8</sub> + 1 eq. $\beta$ CD   | 25                                                                | 6.8                                               | 68.2                                |
|                                                    |                                                                   |                                                   |                                     |
| 2 % PEG6K-cho <sub>1,8</sub> + 2 eq. $\beta$ CD    | 2                                                                 | 1.1                                               | 96.9                                |
| 5 % PEG6K-cho <sub>1,8</sub> + 2 eq. $\beta$ CD    | 5                                                                 | 2.7                                               | 92.3                                |
| 10 % PEG6K-cho <sub>1,8</sub> + 2 eq. $\beta$ CD   | 10                                                                | 5.5                                               | 84.5                                |
| 15 % PEG6K-cho <sub>1,8</sub> + 2 eq. $\beta$ CD   | 15                                                                | 8.2                                               | 76.8                                |
| 20 % PEG6K-cho <sub>1,8</sub> + 2 eq. $\beta$ CD   | 20                                                                | 11.0                                              | 69.0                                |
| 22.5 % PEG6K-cho <sub>1,8</sub> + 2 eq. $\beta$ CD | 22.5                                                              | 12.3                                              | 65.2                                |
| 25 % PEG6K-cho <sub>1,8</sub> + 2 eq. $\beta$ CD   | 25                                                                | 13.7                                              | 61.3                                |

**Table S3.  $T_{gel}$  (in °C) of PEG<sub>8</sub>20K-cho<sub>5,6</sub>/βCD and PEG6K-cho<sub>1,8</sub>/βCD hydrogels with increasing PEG-cho<sub>l</sub> contents (Average ± STDEV, n=3)**

|                                                         | + 1 eq. βCD | + 2 eq. βCD       | without βCD |
|---------------------------------------------------------|-------------|-------------------|-------------|
| <b>2% (w/w) PEG<sub>8</sub>20K-cho<sub>5,6</sub></b>    | b           | b                 | a           |
| <b>5% (w/w) PEG<sub>8</sub>20K-cho<sub>5,6</sub></b>    | b           | b                 | a           |
| <b>10% (w/w) PEG<sub>8</sub>20K-cho<sub>5,6</sub></b>   | 50±4        | 53±3              | 42±4        |
| <b>15% (w/w) PEG<sub>8</sub>20K-cho<sub>5,6</sub></b>   | 58±2        | 75±5              | a           |
| <b>20% (w/w) PEG<sub>8</sub>20K-cho<sub>5,6</sub></b>   | 62±4        | >100 <sup>c</sup> | 43±1        |
| <b>22.5% (w/w) PEG<sub>8</sub>20K-cho<sub>5,6</sub></b> | 65±5        | >100 <sup>c</sup> | a           |
| <b>25% (w/w) PEG<sub>8</sub>20K-cho<sub>5,6</sub></b>   | 70±4        | >100 <sup>c</sup> | a           |
|                                                         | + 1 eq. βCD | + 2 eq. βCD       | without βCD |
| <b>2% (w/w) PEG6000-cho<sub>1,8</sub></b>               | b           | b                 | a           |
| <b>5% (w/w) PEG6000-cho<sub>1,8</sub></b>               | b           | b                 | a           |
| <b>10% (w/w) PEG6000-cho<sub>1,8</sub></b>              | 38±1        | 53±1              | 34±1        |
| <b>15% (w/w) PEG6000-cho<sub>1,8</sub></b>              | 42±1        | 71±3              | a           |
| <b>20% (w/w) PEG6000-cho<sub>1,8</sub></b>              | 55±2        | > 90 <sup>c</sup> | a           |
| <b>22.5% (w/w) PEG6000-cho<sub>1,8</sub></b>            | 63±3        | > 90 <sup>c</sup> | 51±2        |
| <b>25% (w/w) PEG6000-cho<sub>1,8</sub></b>              | 70±4        | > 90 <sup>c</sup> | a           |

<sup>a</sup> not determined

<sup>b</sup> no  $T_{gel}$

<sup>c</sup> Extrapolated values
